# Supplementary material for: Utility of ctDNA in predicting relapse in solid tumors after curative therapy: a meta-analysis
Source: PubMed Central journal article supplement (PMC10317487; doi:10.1093/jncics/pkad040), 2023-05-27

## References:

1. Azad TD, Chaudhuri AA, Fang P, Qiao Y, Esfahani MS, Chabon JJ, et al. Circulating Tumor DNA Analysis for Detection of Minimal Residual Disease After Chemoradiotherapy for Localized Esophageal Cancer. *Gastroenterology*. 2020 Feb;158(3):494-505.e6.
2. Benhaim L, Bouché O, Normand C, Didelot A, Mulot C, Le Corre D, et al. Circulating tumor DNA is a prognostic marker of tumor recurrence in stage II and III colorectal cancer: multicentric, prospective cohort study (ALGECOLS). *Eur J Cancer*. 2021 Dec;159:24–33.
3. Chaudhuri AA, Chabon JJ, Lovejoy AF, Newman AM, Stehr H, Azad TD, et al. Early Detection of Molecular Residual Disease in Localized Lung Cancer by Circulating Tumor DNA Profiling. *Cancer Discov*. 2017 Dec;7(12):1394–403.
4. Chen K, Zhao H, Shi Y, Yang F, Wang LT, Kang G, et al. Perioperative Dynamic Changes in Circulating Tumor DNA in Patients with Lung Cancer (DYNAMIC). *Clin Cancer Res*. 2019 Dec 1;25(23):7058–67.
5. Chen G, Peng J, Xiao Q, Wu HX, Wu X, Wang F, et al. Postoperative circulating tumor DNA as markers of recurrence risk in stages II to III colorectal cancer. *Journal of Hematology & Oncology*. 2021 May 17;14(1):80.
6. Coombes RC, Page K, Salari R, Hastings RK, Armstrong A, Ahmed S, et al. Personalized Detection of Circulating Tumor DNA Antedates Breast Cancer Metastatic Recurrence. *Clin Cancer Res*. 2019 Jul 15;25(14):4255–63.
7. Diehl F, Schmidt K, Choti MA, Romans K, Goodman S, Li M, et al. Circulating mutant DNA to assess tumor dynamics. *Nat Med*. 2008 Sep;14(9):985–90.
8. Garcia-Murillas I, Schiavon G, Weigelt B, Ng C, Hrebien S, Cutts RJ, et al. Mutation tracking in circulating tumor DNA predicts relapse in early breast cancer. *Sci Transl Med*. 2015 Aug 26;7(302):302ra133.
9. Groot VP, Mosier S, Javed AA, Teinor JA, Gemenetzis G, Ding D, et al. Circulating Tumor DNA as a Clinical Test in Resected Pancreatic Cancer. *Clin Cancer Res*. 2019 Aug 15;25(16):4973–84.
10. Henriksen TV, Tarazona N, Frydendahl A, Reinert T, Gimeno-Valiente F, Carbonell-Asins JA, et al. Circulating Tumor DNA in Stage III Colorectal Cancer, beyond Minimal Residual Disease Detection, toward Assessment of Adjuvant Therapy Efficacy and Clinical Behavior of Recurrences. *Clin Cancer Res*. 2022 Feb 1;28(3):507–17.
11. Jiang J, Ye S, Xu Y, Chang L, Hu X, Ru G, et al. Circulating Tumor DNA as a Potential Marker to Detect Minimal Residual Disease and Predict Recurrence in Pancreatic Cancer. *Front Oncol*. 2020 Jul 30;10:1220.
12. Jin S, Zhu D, Shao F, Chen S, Guo Y, Li K, et al. Efficient detection and post-surgical monitoring of colon cancer with a multi-marker DNA methylation liquid biopsy. *Proc Natl Acad Sci U S A*. 2021 Feb 2;118(5):e2017421118.
13. Khakoo S, Carter PD, Brown G, Valeri N, Picchia S, Bali MA, et al. MRI Tumor Regression Grade and Circulating Tumor DNA as Complementary Tools to Assess Response and Guide Therapy Adaptation in Rectal Cancer. *Clin Cancer Res*. 2020 Jan 1;26(1):183–92.
14. Lee B, Lipton L, Cohen J, Tie J, Javed AA, Li L, et al. Circulating tumor DNA as a potential marker of adjuvant chemotherapy benefit following surgery for localized pancreatic cancer. *Ann Oncol*. 2019 Sep 1;30(9):1472–8.
15. McDuff SGR, Hardiman KM, Ulintz PJ, Parikh AR, Zheng H, Kim DW, et al. Circulating Tumor DNA Predicts Pathologic and Clinical Outcomes Following Neoadjuvant Chemoradiation and Surgery for Patients With Locally Advanced Rectal Cancer. *JCO Precision Oncology*. 2021 Nov;5(5):123–32.
16. Moding EJ, Liu Y, Nabet BY, Chabon JJ, Chaudhuri AA, Hui AB, et al. Circulating Tumor DNA Dynamics Predict Benefit from Consolidation Immunotherapy in Locally Advanced Non-Small Cell Lung Cancer. *Nat Cancer*. 2020 Feb;1(2):176–83.

17. Parikh AR, Van Seventer EE, Siravegna G, Hartwig AV, Jaimovich A, He Y, et al. Minimal Residual Disease Detection using a Plasma-only Circulating Tumor DNA Assay in Patients with Colorectal Cancer. *Clin Cancer Res.* 2021 Oct 15;27(20):5586–94.
18. Reinert T, Henriksen TV, Christensen E, Sharma S, Salari R, Sethi H, et al. Analysis of Plasma Cell-Free DNA by Ultradeep Sequencing in Patients With Stages I to III Colorectal Cancer. *JAMA Oncol.* 2019 Aug 1;5(8):1124–31.
19. Sausen M, Phallen J, Adleff V, Jones S, Leary RJ, Barrett MT, et al. Clinical implications of genomic alterations in the tumour and circulation of pancreatic cancer patients. *Nat Commun.* 2015 Jul 7;6:7686.
20. Schøler LV, Reinert T, Ørntoft MBW, Kassentoft CG, Árnadóttir SS, Vang S, et al. Clinical Implications of Monitoring Circulating Tumor DNA in Patients with Colorectal Cancer. *Clinical Cancer Research.* 2017 Sep 14;23(18):5437–45.
21. Tan L, Sandhu S, Lee RJ, Li J, Callahan J, Ftouni S, et al. Prediction and monitoring of relapse in stage III melanoma using circulating tumor DNA. *Ann Oncol.* 2019 May 1;30(5):804–14.
22. Tarazona N, Gimeno-Valiente F, Gambardella V, Zuñiga S, Rentero-Garrido P, Huerta M, et al. Targeted next-generation sequencing of circulating-tumor DNA for tracking minimal residual disease in localized colon cancer. *Ann Oncol.* 2019 Nov 1;30(11):1804–12.
23. Tie J, Cohen JD, Wang Y, Christie M, Simons K, Lee M, et al. Circulating Tumor DNA Analyses as Markers of Recurrence Risk and Benefit of Adjuvant Therapy for Stage III Colon Cancer. *JAMA Oncol.* 2019 Dec 1;5(12):1710–7.
24. Tie J, Cohen JD, Wang Y, Li L, Christie M, Simons K, et al. Serial circulating tumour DNA analysis during multimodality treatment of locally advanced rectal cancer: a prospective biomarker study. *Gut.* 2019 Apr;68(4):663–71.
25. Waldeck S, Mitschke J, Wiesemann S, Rassner M, Andrieux G, Deuter M, et al. Early assessment of circulating tumor DNA after curative-intent resection predicts tumor recurrence in early-stage and locally advanced non-small-cell lung cancer. *Mol Oncol.* 2022 Jan;16(2):527–37.
26. Wang DS, Yang H, Liu XY, Chen ZG, Wang Y, Fong WP, et al. Dynamic monitoring of circulating tumor DNA to predict prognosis and efficacy of adjuvant chemotherapy after resection of colorectal liver metastases. *Theranostics.* 2021;11(14):7018–28.
27. Yang J, Gong Y, Lam VK, Shi Y, Guan Y, Zhang Y, et al. Deep sequencing of circulating tumor DNA detects molecular residual disease and predicts recurrence in gastric cancer. *Cell Death Dis.* 2020 May 11;11(5):1–9.
28. Zviran A, Schulman RC, Shah M, Hill STK, Deochand S, Khamnei CC, et al. Genome-wide cell-free DNA mutational integration enables ultra-sensitive cancer monitoring. *Nat Med.* 2020 Jul;26(7):1114–24.
29. Christensen E, Birkenkamp-Demtröder K, Sethi H, Shchegrova S, Salari R, Nordentoft I, et al. Early Detection of Metastatic Relapse and Monitoring of Therapeutic Efficacy by Ultra-Deep Sequencing of Plasma Cell-Free DNA in Patients With Urothelial Bladder Carcinoma. *JCO.* 2019 Jun 20;37(18):1547–57.
30. Parsons HA, Rhoades J, Reed SC, Gydush G, Ram P, Exman P, et al. Sensitive Detection of Minimal Residual Disease in Patients Treated for Early-Stage Breast Cancer. *Clin Cancer Res.* 2020 Jun 1;26(11):2556–64.
31. Abbosh C, Birkbak NJ, Wilson GA, Jamal-Hanjani M, Constantin T, Salari R, et al. Phylogenetic ctDNA analysis depicts early-stage lung cancer evolution. *Nature.* 2017 Apr 26;545(7655):446–51.
32. Fakih M, Sandhu J, Wang C, Kim J, Chen YJ, Lai L, et al. Evaluation of Comparative Surveillance Strategies of Circulating Tumor DNA, Imaging, and Carcinoembryonic Antigen Levels in Patients With Resected Colorectal Cancer. *JAMA Netw Open.* 2022 Mar 1;5(3):e221093.

33. Flach S, Howarth K, Hackinger S, Pipinikas C, Ellis P, McLay K, et al. Liquid BIOPsy for MiNimal RESidual DiSease Detection in Head and Neck Squamous Cell Carcinoma (LIONESS)—a personalised circulating tumour DNA analysis in head and neck squamous cell carcinoma. *Br J Cancer*. 2022 May;126(8):1186–95.
34. Garcia-Murillas I, Chopra N, Comino-Méndez I, Beaney M, Tovey H, Cutts RJ, et al. Assessment of Molecular Relapse Detection in Early-Stage Breast Cancer. *JAMA Oncol*. 2019 Oct 1;5(10):1473–8.
35. Olsson E, Winter C, George A, Chen Y, Howlin J, Tang MHE, et al. Serial monitoring of circulating tumor DNA in patients with primary breast cancer for detection of occult metastatic disease. *EMBO Mol Med*. 2015 Aug;7(8):1034–47.
36. Peng M, Huang Q, Yin W, Tan S, Chen C, Liu W, et al. Circulating Tumor DNA as a Prognostic Biomarker in Localized Non-small Cell Lung Cancer. *Front Oncol*. 2020 Sep 15;10:561598.
37. Qiu B, Guo W, Zhang F, Lv F, Ji Y, Peng Y, et al. Dynamic recurrence risk and adjuvant chemotherapy benefit prediction by ctDNA in resected NSCLC. *Nat Commun*. 2021 Nov 19;12(1):6770.
38. Tie J, Wang Y, Tomasetti C, Li L, Springer S, Kinde I, et al. Circulating tumor DNA analysis detects minimal residual disease and predicts recurrence in patients with stage II colon cancer. *Sci Transl Med*. 2016 Jul 6;8(346):346ra92.
39. Wang Y, Li L, Cohen JD, Kinde I, Ptak J, Popoli M, et al. Prognostic Potential of Circulating Tumor DNA Measurement in Postoperative Surveillance of Nonmetastatic Colorectal Cancer. *JAMA Oncol*. 2019 Aug 1;5(8):1118–23.

Supplementary Table 1: MOOSE Checklist for Meta-analyses of Observational Studies

| Item No                                     | Recommendation                                                                                                                                                                                                                                                               | Reported on Page No                                                                                                                                                                |
|---------------------------------------------|------------------------------------------------------------------------------------------------------------------------------------------------------------------------------------------------------------------------------------------------------------------------------|------------------------------------------------------------------------------------------------------------------------------------------------------------------------------------|
| Reporting of background should include      |                                                                                                                                                                                                                                                                              |                                                                                                                                                                                    |
| 1                                           | Problem definition                                                                                                                                                                                                                                                           | 4, 5                                                                                                                                                                               |
| 2                                           | Hypothesis statement                                                                                                                                                                                                                                                         | 5                                                                                                                                                                                  |
| 3                                           | Description of study outcome(s)                                                                                                                                                                                                                                              | 5                                                                                                                                                                                  |
| 4                                           | Type of exposure or intervention used                                                                                                                                                                                                                                        | 5                                                                                                                                                                                  |
| 5                                           | Type of study designs used                                                                                                                                                                                                                                                   | 5                                                                                                                                                                                  |
| 6                                           | Study population                                                                                                                                                                                                                                                             | 5                                                                                                                                                                                  |
| Reporting of search strategy should include |                                                                                                                                                                                                                                                                              |                                                                                                                                                                                    |
| 7                                           | Qualifications of searchers (eg, librarians and investigators)                                                                                                                                                                                                               | 6                                                                                                                                                                                  |
| 8                                           | Search strategy, including time period included in the synthesis and key words                                                                                                                                                                                               | 6                                                                                                                                                                                  |
| 9                                           | Effort to include all available studies, including contact with authors                                                                                                                                                                                                      | 6                                                                                                                                                                                  |
| 10                                          | Databases and registries searched                                                                                                                                                                                                                                            | 6                                                                                                                                                                                  |
| 11                                          | Search software used, name and version, including special features used (eg, explosion)                                                                                                                                                                                      | 6                                                                                                                                                                                  |
| 12                                          | Use of hand searching (eg, reference lists of obtained articles)                                                                                                                                                                                                             | Not applicable                                                                                                                                                                     |
| 13                                          | List of citations located and those excluded, including justification                                                                                                                                                                                                        | Table 1 provides list of included citations and figure 1 provides a flow diagram of reasons of study exclusions                                                                    |
| 14                                          | Method of addressing articles published in languages other than English                                                                                                                                                                                                      | Only included English language articles- page 6                                                                                                                                    |
| 15                                          | Method of handling abstracts and unpublished studies                                                                                                                                                                                                                         | Only published literature included-6                                                                                                                                               |
| 16                                          | Description of any contact with authors                                                                                                                                                                                                                                      | None                                                                                                                                                                               |
| Reporting of methods should include         |                                                                                                                                                                                                                                                                              |                                                                                                                                                                                    |
| 17                                          | Description of relevance or appropriateness of studies assembled for assessing the hypothesis to be tested                                                                                                                                                                   | 6                                                                                                                                                                                  |
| 18                                          | Rationale for the selection and coding of data (eg, sound clinical principles or convenience)                                                                                                                                                                                | 6- based on hypothesis and included only those studies that had actual recurrence and ctDNA data available                                                                         |
| 19                                          | Documentation of how data were classified and coded (eg, multiple raters, blinding and interrater reliability)                                                                                                                                                               | 6                                                                                                                                                                                  |
| 20                                          | Assessment of confounding (eg, comparability of cases and controls in studies where appropriate)                                                                                                                                                                             | 6- risk of bias assessment by Newcastle Ottawa scale which assess adjustment for confounding                                                                                       |
| 21                                          | Assessment of study quality, including blinding of quality assessors, stratification or regression on possible predictors of study results                                                                                                                                   | 6- assessment of study quality of Newcastle Ottawa scale                                                                                                                           |
| 22                                          | Assessment of heterogeneity                                                                                                                                                                                                                                                  | Page 7                                                                                                                                                                             |
| 23                                          | Description of statistical methods (eg, complete description of fixed or random effects models, justification of whether the chosen models account for predictors of study results, dose-response models, or cumulative meta-analysis) in sufficient detail to be replicated | Page 7                                                                                                                                                                             |
| 24                                          | Provision of appropriate tables and graphics                                                                                                                                                                                                                                 | Table 1- baseline characteristics<br>Table2- metaregression results<br>Figure 1- flow diagram of the study<br>Figure 2 and 3 represent statistically significant subgroup analysis |

|                                     |                                                                     |                                                                                                                        |
|-------------------------------------|---------------------------------------------------------------------|------------------------------------------------------------------------------------------------------------------------|
|                                     |                                                                     | Other result tables are presented in supplementary                                                                     |
| Reporting of results should include |                                                                     |                                                                                                                        |
| 25                                  | Graphic summarizing individual study estimates and overall estimate | Individual study estimates are summarised in table 1. Overall study estimates are summarised in results- page 9 and 10 |
| 26                                  | Table giving descriptive information for each study included        | See Table 1                                                                                                            |
| 27                                  | Results of sensitivity testing (eg, subgroup analysis)              | Page 9 and 10- results section<br>Figure 2 and 3<br>Figure S2<br>Table S6                                              |
| 28                                  | Indication of statistical uncertainty of findings                   | Heterogeneity estimates have been included, page 6 and 7                                                               |

| Item No                                 | Recommendation                                                                                                            | Reported on Page No                                                                                                                                                                                                                                             |
|-----------------------------------------|---------------------------------------------------------------------------------------------------------------------------|-----------------------------------------------------------------------------------------------------------------------------------------------------------------------------------------------------------------------------------------------------------------|
| Reporting of discussion should include  |                                                                                                                           |                                                                                                                                                                                                                                                                 |
| 29                                      | Quantitative assessment of bias (eg, publication bias)                                                                    | Page 10,11 in results- we did a qualitative visual assessment as Egger's test is usually underpowered to detect statistical significance.                                                                                                                       |
| 30                                      | Justification for exclusion (eg, exclusion of non-English language citations)                                             | We did not include this in main discussion as we did not think it was warranted. English language studies comprehensively cover literature and a non-english language search was not deemed necessary as most studies included in the review were fairly recent |
| 31                                      | Assessment of quality of included studies                                                                                 | A comment has been made in discussion and quality assessment has been included as a table in supplementary- page 11                                                                                                                                             |
| Reporting of conclusions should include |                                                                                                                           |                                                                                                                                                                                                                                                                 |
| 32                                      | Consideration of alternative explanations for observed results                                                            | Discussed throughout discussion- page 11-15                                                                                                                                                                                                                     |
| 33                                      | Generalization of the conclusions (ie, appropriate for the data presented and within the domain of the literature review) | 16                                                                                                                                                                                                                                                              |
| 34                                      | Guidelines for future research                                                                                            | 16                                                                                                                                                                                                                                                              |
| 35                                      | Disclosure of funding source                                                                                              | 24                                                                                                                                                                                                                                                              |

Supplementary Table 2: Risk of Bias Assessment (Newcastle Ottawa Scale)

| Studies                         | NOS- Selection | NOS- Comparability | NOS-outcomes | Overall Quality |
|---------------------------------|----------------|--------------------|--------------|-----------------|
| Azad et al, 2020 (1)            | 3              | 1                  | 1            | poor            |
| Benhaim et al, 2021 (2)         | 3              | 2                  | 3            | Good            |
| Chaudhuri et al, 2017 (3)       | 3              | 1                  | 2            | Good            |
| Chen et al, 2019 (4)            | 3              | 0                  | 2            | Poor            |
| Chen et al, 2021(5)             | 3              | 1                  | 2            | Good            |
| Coombes et al, 2019 (6)         | 3              | 0                  | 2            | Poor            |
| Diehl et al, 2008 (7)           | 3              | 0                  | 2            | Poor            |
| Garcia Murillas et al, 2015 (8) | 3              | 2                  | 1            | Poor            |
| Groot et al, 2019 (9)           | 3              | 2                  | 2            | Good            |
| Henriksen et al, 2022 (10)      | 3              | 2                  | 2            | Good            |
| Jiang et al, 2020 (11)          | 3              | 0                  | 1            | Poor            |
| Jin et al, 2020 (12)            | 3              | 0                  | 1            | Poor            |
| Khakoo et al, 2019(13)          | 3              | 0                  | 2            | Poor            |
| Lee et al, 2019 (14)            | 3              | 0                  | 2            | Poor            |
| McDuff et al, 2021 (15)         | 3              | 0                  | 2            | Poor            |
| Moding et al, 2020 (16)         | 2              | 0                  | 1            | Poor            |
| Parikh et al, 2021(17)          | 3              | 0                  | 1            | Poor            |
| Reinert et al, 2019 (18)        | 3              | 1                  | 2            | Good            |
| Sausen et al, 2015(19)          | 3              | 0                  | 1            | Poor            |
| Scholer et al, 2017 (20)        | 2              | 0                  | 1            | Poor            |
| Tan et al, 2019 (21)            | 3              | 2                  | 3            | Good            |
| Tarazona et al, 2019 (22)       | 3              | 2                  | 2            | Good            |
| Tie et al, 2019 (24)            | 3              | 2                  | 2            | Good            |
| Tie et al, 2019 (23)            | 3              | 2                  | 2            | Good            |

|                              |   |   |   |      |
|------------------------------|---|---|---|------|
| Waldeck et al, 2022 (25)     | 2 | 0 | 1 | Poor |
| Wang et al, 2021 (26)        | 3 | 2 | 1 | Poor |
| Yang et al, 2020 (27)        | 3 | 0 | 2 | Poor |
| Zviran et al, 2020 (28)      | 2 | 0 | 1 | Poor |
| Christensen et al, 2019 (29) | 3 | 2 | 2 | Good |
| Abbosh et al, 2017 (31)      | 3 | 0 | 1 | Poor |
| Fakih et al, 2022 (32)       | 2 | 1 | 2 | Fair |
| Flach et al, 2022 (33)       | 2 | 0 | 1 | Poor |
| Garcia Murillas, 2019 (34)   | 3 | 1 | 2 | Good |
| Olsson et al, 2015 (35)      | 2 | 0 | 1 | Poor |
| Peng et al, 2020 (36)        | 3 | 1 | 2 | Good |
| Qiu et al, 2021 (37)         | 3 | 2 | 1 | Poor |
| Tie et al, 2016 (38)         | 3 | 2 | 2 | Good |
| Wang et al, 2019 (39)        | 3 | 0 | 2 | Poor |
| Parsons et al, 2021 (30)     | 3 | 2 | 2 | Good |

Supplementary Table 3: Landmark Studies

| Study details              | Primary site      | Testing methodology | Panel type     | No of patients | Median Age (Years) | Smoking (%) | Proportion of males (%) | Proportion of >Stage I II (%) | Primary treatment | Proportion receiving adjuvant chemo (%) | Median Time to landmark analysis (days) | Landmark sample pre or post adjuvant | Sensitivity (%) | Specificity (%) | Median lead time (months) |
|----------------------------|-------------------|---------------------|----------------|----------------|--------------------|-------------|-------------------------|-------------------------------|-------------------|-----------------------------------------|-----------------------------------------|--------------------------------------|-----------------|-----------------|---------------------------|
| Azad et al, 2020(1)        | Gastric esophagus | NGS                 | Tumor informed | 45             | 67                 | 64.4        | 88.9                    | 71                            | Radiation         | 0                                       | 86                                      | NA                                   | 77.7            | 95.4            | 3.8                       |
| Yang et al, 2020 (27)      | Gastroesophageal  | NGS                 | Tumor informed | 46             | 54                 | NA          | 83                      | 50                            | surgery           | 98                                      | 28                                      | pre                                  | 41.17           | 100             | 6                         |
| Chen et al, 2021(5)        | Colorectal        | NGS                 | Tumor informed | 240            | 60                 | NA          | 56.7                    | 53.3                          | surgery           | 72.5                                    | 5                                       | pre                                  | 60              | 96.3            | 5                         |
| Diehl et al, 2008 (7)      | Colorectal        | PCR                 | Tumor informed | 18             | 59.8               | NA          | 44                      | 94                            | surgery           | NA                                      | 34                                      | NA                                   | 100             | 80              | NA                        |
| Henriksen et al, 2022 (10) | Colorectal        | NGS                 | Tumor informed | 160            | NA                 | NA          | 59.3                    | NA                            | surgery           | 86.9                                    | 14                                      | Pre                                  | 42.1            | 96.1            | 10                        |
| Jin et al, 2020 (12)       | Colorectal        | PCR                 | Tumor informed | 82             | 66                 | NA          | 64.6                    | 50                            | surgery           | 85.3                                    | 14                                      | pre                                  | 55              | 71.7            | NA                        |
| Khakoo et al, 2019 (13)    | Colorectal        | PCR                 | Tumor informed | 23             | 59                 | NA          | 61.7                    | 87.2                          | surgery           | 0                                       | 47                                      | NA                                   | 75              | 100             | 2.6                       |
| Benhaim et al, 2021 (2)    | Colorectal        | PCR                 | Tumor informed | 184            | 66.7               | NA          | 57.8                    | 45.5                          | surgery           | 52.4                                    | 5                                       | pre                                  | 27.6            | 92.9            | 3.1                       |
| Wang et al, 2021 (26)      | Colorectal        | NGS                 | Tumor agnostic | 91             | 59                 | NA          | 51.6                    | NA                            | surgery           | 92                                      | 38                                      | pre                                  | 57.44           | 80              | NA                        |
| McDuff et al,              | Colorectal        | NGS                 | Tumor          | 29             | 54                 | NA          | 52                      | 79                            | surgery           | 38                                      | 90                                      | NA                                   | 66.6            | 100             | NA                        |



|                           |            |     |                |     |      |      |      |      |           |      |     |      |      |       |      |
|---------------------------|------------|-----|----------------|-----|------|------|------|------|-----------|------|-----|------|------|-------|------|
| 2021 (15)                 |            |     | informed       |     |      |      |      |      |           |      |     |      |      |       |      |
| Parikh et al, 2021(17)    | Colorectal | NGS | Tumor agnostic | 84  | 60   | NA   | 60.7 | 66.6 | surgery   | 45   | 28  | post | 55.6 | 95.3  | NA   |
| Reinert et al, 2019 (18)  | Colorectal | NGS | Tumor informed | 125 | 70   | NA   | 58.4 | 64.8 | surgery   | 77   | 30  | pre  | 70   | 88.1  | 8.7  |
| Tarazona et al, 2019 (22) | Colorectal | PCR | Tumor informed | 94  | 71   | NA   | 64.9 | 41   | surgery   | 43.3 | NA  | pre  | 44.4 | 89.6  | 11.5 |
| Tie et al, 2019 (23)      | Colorectal | NGS | Tumor informed | 96  | 64   | NA   | 51   | 100  | surgery   | 100  | 42  | pre  | 42   | 94.4  | NA   |
| Scholer et al, 2017 (20)  | Colorectal | PCR | Tumor informed | 26  | NA   | NA   | NA   | NA   | surgery   | 32.6 | 30  | pre  | 60   | 100   | 9.4  |
| Tie et al, 2019 (24)      | Colorectal | NGS | Tumor informed | 159 | 62   | NA   | 67.3 | 78   | surgery   | 64.1 | 49  | post | 47.8 | 94.1  | NA   |
| Chaudhuri et al, 2017 (3) | Lung       | NGS | Tumor Agnostic | 40  | 66.5 | 88   | 68   | 64   | Radiation | 70   | 120 | NA   | 94   | 100   | 5.2  |
| Chen et al, 2019 (4)      | Lung       | NGS | Tumor Agnostic | 27  | 65   | 57.7 | 69   |      | surgery   | 53.8 | 3   | pre  | 85.7 | 70    | NA   |
| Waldeck et al, 2022 (25)  | Lung       | NGS | Tumor informed | 21  | 70   | 100  | 67   | 86.7 | surgery   | 42.8 | 14  | pre  | 50   | 100   | 2.5  |
| Zviran et al, 2020 (28)   | Lung       | NGS | Tumor informed | 22  | 66   | NA   | 46.1 | NA   | surgery   | NA   | 17  | NA   | 100  | 70.58 | NA   |
| Moding et al, 2020 (16)   | Lung       | NGS | Tumor informed | 28  | 68.5 | 80   | 53.8 | 90.8 | Radiation | 0    | 7   | NA   | 75   | 93    | 4.1  |
| Coombes et al, 2019 (6)   | Breast     | NGS | Tumor Informed | 49  | 57   | NA   | 0    | 67   | surgery   | 65   | 120 | post | 55.6 | 100   | 8.9  |
| Parsons et al, 2021 (30)  | Breast     | NGS | Tumor Informed | 142 | 35   | NA   | 0    | 27   | Surgery   | 91.6 | 426 | Post | 19   | 100   | NA   |

|                                 |          |     |                |    |    |    |      |      |         |      |    |     |      |      |     |
|---------------------------------|----------|-----|----------------|----|----|----|------|------|---------|------|----|-----|------|------|-----|
| Garcia Murillas et al, 2015 (8) | Breast   | PCR | Tumor Informed | 55 | NA | NA | 0    | NA   | surgery | 0    | 21 | NA  | 50   | 96   | 7.9 |
| Groot et al, 2019 (9)           | Pancreas | PCR | Tumor Informed | 59 | 70 | NA | 53   | 27   | surgery | 41   | 24 | pre | 37   | 92.8 | 2.8 |
| Jiang et al, 2020 (11)          | Pancreas | NGS | Tumor Informed | 27 | 62 | NA | 63   | 18.5 | surgery | NA   | 7  | pre | 57.1 | 92.3 | NA  |
| Lee et al, 2019 (14)            | Pancreas | PCR | Tumor informed | 42 | 66 | NA | 62.1 | NA   | surgery | 78.3 | 45 | 1   | 56.5 | 100  | NA  |
| Sausen et al, 2015(19)          | Pancreas | PCR | Tumor informed | 24 | 69 | NA | 62.4 | 0    | surgery | 86.1 | NA | NA  | 57.1 | 75   | 6.5 |
| Tan et al, 2019 (21)            | Melanoma | PCR | Tumor informed | 68 | 57 | NA | 66   | 100  | surgery | 24   | 14 | pre | 44.8 | 100  | 2   |
| Christensen et al, 2019 (29)    | Bladder  | NGS | Tumor informed | 66 | NA | NA | NA   | NA   | surgery | NA   | NA | NA  | 45.8 | 97.1 | 3.2 |

NGS- Next generation sequencing, PCR- polymerase chain reaction, NA- not available

Supplementary Table 4: Surveillance Studies

| Study details             | Primary site | Testing methodology | Panel type     | No of patients | Median Age (Years) | Smoking (%) | Proportion of males (%) | Proportion of >StageIII (%) | Primary treatment | Proportion receiving adjuvant chemo (%) | Median no of surveillance draws | Sensitivity (%) | Specificity (%) | Median lead time (months) |
|---------------------------|--------------|---------------------|----------------|----------------|--------------------|-------------|-------------------------|-----------------------------|-------------------|-----------------------------------------|---------------------------------|-----------------|-----------------|---------------------------|
| Chaudhuri et al, 2017 (3) | Lung         | NGS                 | Tumor Agnostic | 40             | 66.5               | 88          | 68                      | 64                          | surgery           | 70                                      | Till relapse                    | 100             | 100             | 5.2                       |
| Qiu et al, 2021 (37)      | Lung         | NGS                 | Tumor informed | 89             | 64                 | 59          | 65                      | 47                          | surgery           | 70                                      |                                 | 79.4            | 92.7            | NA                        |
| Moding et al, 2020 (16)   | Lung         | NGS                 | Tumor informed | 28             | 68.5               | 80          | 53.8                    | 90.8                        | surgery           | 0                                       | NA                              | 100             | 100             | 4.1                       |
| Waldeck et al, 2022 (25)  | Lung         | NGS                 | Tumor informed | 21             | 70                 | 100         | 67                      | 86.7                        | surgery           | 42.8                                    | 9                               | 55.5            | 83.3            | 2.5                       |
| Abbosh et al, 2017 (31)   | Lung         | NGS                 | Tumor informed | 24             |                    | NA          |                         |                             | surgery           |                                         |                                 | 92.85           | 90              | 2.3                       |
| Peng et al, 2020 (36)     | Lung         | NGS                 | Tumor agnostic | 77             | 60.3               | 36.4        | 72.7                    | 20.7                        | surgery           | 24.7                                    | 5                               | 63.3            | 61.9            | 12.6                      |
| Chen et al, 2021(5)       | Colorectal   | NGS                 | Tumor Informed | 240            | 60                 | NA          | 56.7                    | 53.3                        | surgery           | 72.5                                    | NA                              | 82.6            | 94.1            | 5                         |
| Tie et al, 2016 (38)      | colorectal   | NGS                 | Tumor informed | 178            | 65                 | NA          | 57                      | 0                           | surgery           |                                         | 8                               | 40.74           | 98              | 5.5                       |

|                            |            |     |                |     |    |    |      |      |         |      |              |      |       |      |
|----------------------------|------------|-----|----------------|-----|----|----|------|------|---------|------|--------------|------|-------|------|
|                            |            |     | d              |     |    |    |      |      |         |      |              |      |       |      |
| Faikh et al, 2022 (32)     | Colorectal | NGS | Tumor informed | 48  | 60 | NA | 58.3 | 67   | surgery | 33   | 12           | 53.3 | 100   | 0.7  |
| Wang et al, 2019 (39)      | Colorectal | NGS | Tumor Informed | 58  | 69 | NA | 59   | 48.2 | surgery | 31   | 12           | 100  | 93.75 | 3    |
| Henriksen et al, 2022 (10) | Colorectal | NGS | Tumor informed | 160 | NA | NA | 59.3 | NA   | surgery | 86.9 | 6            | 88   | 98.8  | 10   |
| Parikh et al, 2021 (17)    | Colorectal | NGS | Tumor agnostic | 84  | 60 | NA | 60.7 | 66.6 | surgery | 45   | Till relapse | 70.4 | 95.8  | NA   |
| Reinert et al, 2019 (18)   | Colorectal | NGS | Tumor informed | 125 | 70 | NA | 58.4 | 64.8 | surgery | 77   | 12           | 87.5 | 98.3  | 8.7  |
| Scholer et al, 2017 (20)   | Colorectal | PCR | Tumor informed | 26  | NA | NA | NA   | NA   | surgery | 32.6 | 8            | 100  | 100   | 9.4  |
| Tarazona et al, 2019 (22)  | Colorectal | PCR | Tumor informed | 94  | 71 | NA | 64.9 | 41   | surgery | 43.3 | 9            | 77.7 | 96.5  | 11.5 |
| Wang et al, 2022 (26)      | Colorectal | NGS | Tumor informed | 91  | 59 | NA | 51.6 | NA   | surgery | 92   | 12           | 100  | 93.75 |      |
| Coombes et al, 2019 (6)    | Breast     | NGS | Tumor Informed | 49  | 57 | NA | 0    | 67   | surgery | 65   | 8            | 88.9 | 100   | 8.9  |
| Garcia Murillas et         | Breast     | PCR | Tumor Inform   | 55  | NA | NA | 0    | NA   | surgery | 0    | 5            | 80   | 96.4  | 7.9  |

|                              |               |     |                |     |      |      |      |     |         |      |    |      |      |      |
|------------------------------|---------------|-----|----------------|-----|------|------|------|-----|---------|------|----|------|------|------|
| al, 2015 (8)                 |               |     | ed             |     |      |      |      |     |         |      |    |      |      |      |
| Garcia Murillas, 2019 (34)   | Breast        | PCR | Tumor informed | 101 | 54   | NA   | 0    |     |         | 16.8 | 12 | 79   | 91.6 | 10.7 |
| Olsson et al, 2015 (35)      | Breast        | PCR | Tumor informed | 20  | 56.5 | NA   | 0    | 15  | surgery | 0    | 6  | 92.8 | 100  | 11   |
| Groot et al, 2019 (9)        | Pancreas      | PCR | Tumor Informed | 59  | 70   | NA   | 53   | 27  | surgery | 41   | 5  | 90   | 88   | 2.8  |
| Tan et al, 2019 (21)         | Melanoma      | PCR | Tumor informed | 68  | 57   | NA   | 66   | 100 | surgery | 24   | 6  | 66.6 | 92.1 | 2    |
| Yang et al, 2020 (27)        | GE            | NGS | Tumor informed | 46  | 54   | NA   | 83   | 50  | surgery | 98   | NA | 84.2 | 96   | 6    |
| Christensen et al, 2019 (29) | Bladder       | NGS | Tumor informed | 66  |      | NA   |      |     | surgery |      |    | 100  | 92.2 | 3.2  |
| Flach et al, 2022 (33)       | Head and Neck | NGS | Tumor informed | 17  | 63   | 47.1 | 76.5 |     | surgery |      |    | 100  | 100  |      |

NGS- Next generation sequencing, PCR- polymerase chain reaction, NA- not available

Supplementary Table 5: Testing Methodology Details:

|                                 | Testing methodology | Panel type     | Technology                                                       | No of target genes                                                                | No of target SNVs/regions/exons | No of SNVs require to define ctDNA+ | Depth of assay          | LOD of assay |
|---------------------------------|---------------------|----------------|------------------------------------------------------------------|-----------------------------------------------------------------------------------|---------------------------------|-------------------------------------|-------------------------|--------------|
| Azad et al, 2020 (1)            | NGS                 | Tumor informed | CAPP-Seq (capture based NGS)                                     | 607                                                                               | 802                             | $\geq 2$                            | 10,000X                 | 0.025%       |
| Benhaim et al, 2021 (2)         | PCR                 | Tumor informed | Digital droplet PCR                                              | 5 genes (KRAS, BRAF, NRAS, PIK3CA, TP53) and 2 methylation markers (WIF1 and NPY) |                                 |                                     |                         |              |
| Chaudhuri et al, 2017 (3)       | NGS                 | Tumor Agnostic | CAPP-Seq (capture based NGS)                                     | 128                                                                               |                                 | $\geq 5$                            | 10,000X                 | 0.025%       |
| Chen et al, 2019 (4)            | NGS                 | Tumor Agnostic | Single molecule amplification and sequencing technology (cSMART) | 8                                                                                 | 64                              |                                     | 20,000X                 | 0.01%        |
| Chen et al, 2021(5)             | NGS                 | Tumor informed | Geneseq Prime (capture based NGS)                                | 425                                                                               |                                 |                                     | 4693X                   |              |
| Coombes et al, 2019 (6)         | NGS                 | Tumor Informed | SIGNATERA (amplicon based NGS)                                   |                                                                                   | 16                              |                                     | 100,000 X               | 0.01%        |
| Diehl et al, 2008 (7)           | PCR                 | Tumor Agnostic | BEAMing and real time PCR                                        | 4                                                                                 | 27                              |                                     |                         | 0.18%        |
| Garcia Murillas et al, 2015 (8) | PCR                 | Tumor Informed | Digital droplet PCR                                              | 14                                                                                |                                 | $> 2$                               | 20,000X                 |              |
| Groot et al, 2019 (9)           | PCR                 | Tumor Informed | Digital droplet PCR (RAINDANCE PCR system)                       | 1 (KRAS only)                                                                     | 4                               |                                     | 20,000 droplets/variant | 0.01%        |
| Henriksen et                    | NGS                 | Tumor          | SIGNATERA                                                        |                                                                                   | 16                              | $> 2$                               | $> 100,000$             | 0.01%        |

|                           |     |                 |                                           |                            |     |     |                         |         |
|---------------------------|-----|-----------------|-------------------------------------------|----------------------------|-----|-----|-------------------------|---------|
| al, 2022 (10)             |     | informe d       | (amplicon based NGS)                      |                            |     |     | X                       |         |
| Jiang et al, 2020 (11)    | NGS | Tumor Agnostic  | Capture NGS (Illumina)                    | 1017                       |     |     | 1323.8x                 |         |
| Jin et al, 2020 (12)      | PCR | Tumor Agnostic  | qPCR (methylation assay)                  | 1 (SEPT9)                  | 10  |     |                         | 0.05%   |
| Khakoo et al, 2019(13)    | PCR | Tumor Informe d | Digital droplet PCR                       | 6                          |     |     | 40,000 droplets/variant | 0.0426% |
| Lee et al, 2019 (14)      | NGS | Tumor informe d | Safe Seq NGS (amplicon based NGS)         | 1 (KRAS only)              |     |     |                         | 0.1%    |
| McDuff et al, 2021 (15)   | NGS | Tumor informe d | Digital droplet PCR                       |                            |     |     |                         | 0.01%   |
| Moding et al, 2020 (16)   | NGS | Tumor informe d | CAPP-Seq (capture based NGS)              |                            |     | 4-8 | 10,000X                 | 0.025%  |
| Parikh et al, 2021(17)    | NGS | Tumor agnostic  | Guardant Reveal test (Capture NGS)        | 73                         |     |     |                         |         |
| Reinert et al, 2019 (18)  | NGS | Tumor informe d | SIGNATERA (amplicon based NGS)            |                            | 16  | >2  | >100,000 X              | 0.01%   |
| Sausen et al, 2015(19)    | PCR | Tumor informe d | Digital droplet PCR (bioRAD qx 200)       | 3 (KRAS, BRAP or PIK3CA)   |     |     | 40,000X                 | 0.01%   |
| Scholer et al, 2017 (20)  | PCR | Tumor informe d | Digital droplet PCR (bioRAD qx 200)       |                            | 110 |     | 40,000X                 | 0.08%   |
| Tan et al, 2019 (21)      | PCR | Tumor informe d | Digital droplet PCR (bioRAD qx 200)       | 1 (TERT promoter mutation) |     |     | 40,000X                 |         |
| Tarazona et al, 2019 (22) | PCR | Tumor informe d | Digital droplet PCR bioRAD qx 100         | 29 genes                   |     |     | 20,000X                 |         |
| Tie et al, 2019 (24)      | NGS | Tumor informe d | Safe-Seq NGS (error education technology) | 15                         |     | 1   |                         |         |
| Tie et al, 2019 (23)      | NGS | Tumor informe   | Safe-Seq NGS (error education             | 15                         |     | 1   |                         |         |

|                              |     |                |                                                                              |      |    |          |                 |         |
|------------------------------|-----|----------------|------------------------------------------------------------------------------|------|----|----------|-----------------|---------|
|                              |     | d              | technology)                                                                  |      |    |          |                 |         |
| Waldeck et al, 2022 (25)     | NGS | Tumor informed | Capture based NGS                                                            | 18   | 52 |          |                 | 0.001%  |
| Wang et al, 2021 (26)        | NGS | Tumor agnostic | Capture based NGS                                                            | 451  |    |          | 20,000X         |         |
| Yang et al, 2020 (27)        | NGS | Tumor informed | Capture NGS (ER-Seq-Enrich rare Mutation Sequencing)                         | 1021 |    | 3        |                 |         |
| Zviran et al, 2020 (28)      | NGS | Tumor informed | Whole genome sequencing (MRDetect)                                           |      |    |          | 30X             | 0.001%  |
| Christensen et al, 2019 (29) | NGS | Tumor informed | SIGNATERA (amplicon based NGS)                                               |      | 16 | $\geq 2$ | $>100,000X$     | 0.01%   |
| Abbosh et al, 2017 (31)      | NGS | Tumor informed | Multiplex PCR NGS (M-seq)                                                    |      | 18 | $\geq 2$ |                 | 0.1%    |
| Fakih et al, 2022 (32)       | NGS | Tumor informed | SIGNATERA (amplicon based NGS)                                               |      | 16 | $\geq 2$ | $>100,000X$     | 0.01%   |
| Flach et al, 2022 (33)       | NGS | Tumor informed | Multiplex PCR with target NGS (RaDaR)                                        |      | 21 | $\geq 1$ |                 | 0.0011% |
| Garcia Murillas, 2019 (34)   | PCR | Tumor informed | Digital droplet PCR                                                          | 14   |    | $\geq 2$ | 20,000X         |         |
| Olsson et al, 2015 (35)      | PCR | Tumor informed | Digital droplet PCR (detection of chromosomal rearrangements)                | 4-6  |    |          | Approx. 25,000X | 0.01%   |
| Peng et al, 2020 (36)        | NGS | Tumor informed | cSMART                                                                       | 127  |    |          |                 |         |
| Qiu et al, 2021 (37)         | NGS | Tumor informed | Ultra-deep sequencing using Capture NGS (Automated Triplet Groom sequencing) | 139  |    | $\geq 1$ | 30,000X         |         |



|                          |     |                | (ATG-Seq)         |    |    |          |  |  |
|--------------------------|-----|----------------|-------------------|----|----|----------|--|--|
| Tie et al, 2016 (38)     | NGS | Tumor informed | Safe-Seq NGS      | 15 |    | 1        |  |  |
| Wang et al, 2019 (39)    | NGS | Tumor Informed | Safe-Seq NGS      | 15 |    | 1        |  |  |
| Parsons et al, 2021 (30) | NGS | Tumor Informed | Duplex sequencing |    | 57 | $\geq 2$ |  |  |

NGS- Next generation sequencing, PCR- polymerase chain reaction, NA- not available, LOD-limit of detection

Supplementary Table 6: Subgroup analysis for Sensitivity and Specificity

| <b>Landmark Analysis</b>               |                  |         |             |         |
|----------------------------------------|------------------|---------|-------------|---------|
|                                        | Sensitivity rank | P value | Specificity | P value |
| <b>Timing of Landmark analysis</b>     |                  |         |             |         |
| Pre-chemotherapy                       | 9.07             | 0.52    | 8.7         | 0.23    |
| Post Chemotherapy                      | 11               |         | 12.2        |         |
| <b>Panel</b>                           |                  |         |             |         |
| Tumor informed                         | 14.4             | 0.21    | 16.4        | 0.22    |
| Tumor Agnostic                         | 21.1             |         | 11.2        |         |
| <b>Disease sites</b>                   |                  |         |             |         |
| Lung                                   | 24.1             | 0.12    | 13          | 0.23    |
| Breast                                 | 9                |         | 22.7        |         |
| Colorectal                             | 15.5             |         | 14          |         |
| Pancreas                               | 13.5             |         | 12.1        |         |
| Others                                 | 11.8             |         | 21.8        |         |
| <b>Surveillance Analysis</b>           |                  |         |             |         |
|                                        | Sensitivity rank | P value | Specificity | P value |
| <b>Timing of Surveillance analysis</b> |                  |         |             |         |
| Tumor Informed                         | 12.79            | 0.62    | 12.7        | 0.69    |
| Tumor Agnostic                         | 10.50            |         | 11          |         |
| <b>Disease sites</b>                   |                  |         |             |         |
| Lung                                   | 12.83            | 0.73    | 9.5         | 0.33    |
| Breast                                 | 12.50            |         | 15          |         |
| Colorectal                             | 10.78            |         | 14.89       |         |
| Others                                 | 15.20            |         | 9.8         |         |

Supplementary Table 7: Meta-regression for colorectal cancer studies (Landmark analysis)

|                                   | Colorectal cancer |                 |           |
|-----------------------------------|-------------------|-----------------|-----------|
| Variable                          | Beta coefficient  | <i>p</i> -value | N studies |
| Median Age                        | -0.42             | 0.18            | 12        |
| Proportion of Males               | -0.15             | 0.63            | 13        |
| Smoking                           | -                 | -               | -         |
| >=Stage III                       | 0.45              | 0.17            | 11        |
| Time to Landmark                  | 0.17              | 0.58            | 13        |
| % receiving adjuvant chemotherapy | -0.12             | 0.36            | 12        |
| %receiving NACT                   | -0.98             | 0.12            | 3         |
| Baseline ctDNA positivity         | 0.09              | 0.75            | 13        |

Supplementary Table 8: Meta-regression for sensitivity and specificity (Landmark Analysis)

|                                   | Sensitivity      |                 |           | Specificity      |                 |           |
|-----------------------------------|------------------|-----------------|-----------|------------------|-----------------|-----------|
| Variable                          | Beta coefficient | <i>p</i> -value | N studies | Beta coefficient | <i>p</i> -value | N studies |
| Median Age                        | 0.21             | 0.3             | 26        | -0.28            | 0.17            | 26        |
| Proportion of Males               | 0.24             | 0.23            | 28        | -0.99            | 0.33            | 28        |
| Smoking                           | -0.58            | 0.31            | 5         | 0.76             | 0.13            | 5         |
| >=Stage III                       | 0.26             | 0.23            | 23        | 0.28             | 0.2             | 23        |
| Time to Landmark                  | -0.006           | 0.98            | 27        | 0.28             | 0.16            | 27        |
| % receiving adjuvant chemotherapy | 0.08             | 0.73            | 23        | -0.31            | 0.15            | 23        |
| %receiving NACT                   | 0.12             | 0.79            | 7         | -0.573           | 0.18            | 6         |
| Baseline ctDNA positivity         | 0.54             | 0.005           | 26        | -0.32            | 0.12            | 26        |

NACT-neoadjuvant chemotherapy

Supplementary Table 9: Meta-regression for sensitivity and specificity (Surveillance Analysis)

|            | Sensitivity      |                 |           | Specificity      |                 |           |
|------------|------------------|-----------------|-----------|------------------|-----------------|-----------|
| Variable   | Beta coefficient | <i>p</i> -value | N studies | Beta coefficient | <i>p</i> -value | N studies |
| Median Age | 0.06             | 0.8             | 19        | 0.63             | 0.54            | 19        |

|                                   |       |      |    |       |       |    |
|-----------------------------------|-------|------|----|-------|-------|----|
| Proportion of Males               | -0.25 | 0.27 | 21 | -0.32 | 0.15  | 21 |
| >=Stage III                       | 0.36  | 0.16 | 17 | 0.30  | 0.24  | 17 |
| No of surveillance draws          | 0.24  | 0.38 | 15 | 0.55  | 0.03  | 15 |
| % receiving adjuvant chemotherapy | 0.39  | 0.17 | 18 | 0.49  | 0.038 | 18 |
| %receiving NACT                   | 0.076 | 0.89 | 6  | -0.15 | 0.78  | 6  |
| Baseline ctDNA positivity         | 0.32  | 0.16 | 21 | 0.35  | 0.12  | 21 |

NACT-neoadjuvant chemotherapy

Supplementary Figure 1: Landmark Analysis by timing of sample with respect to adjuvant chemotherapy

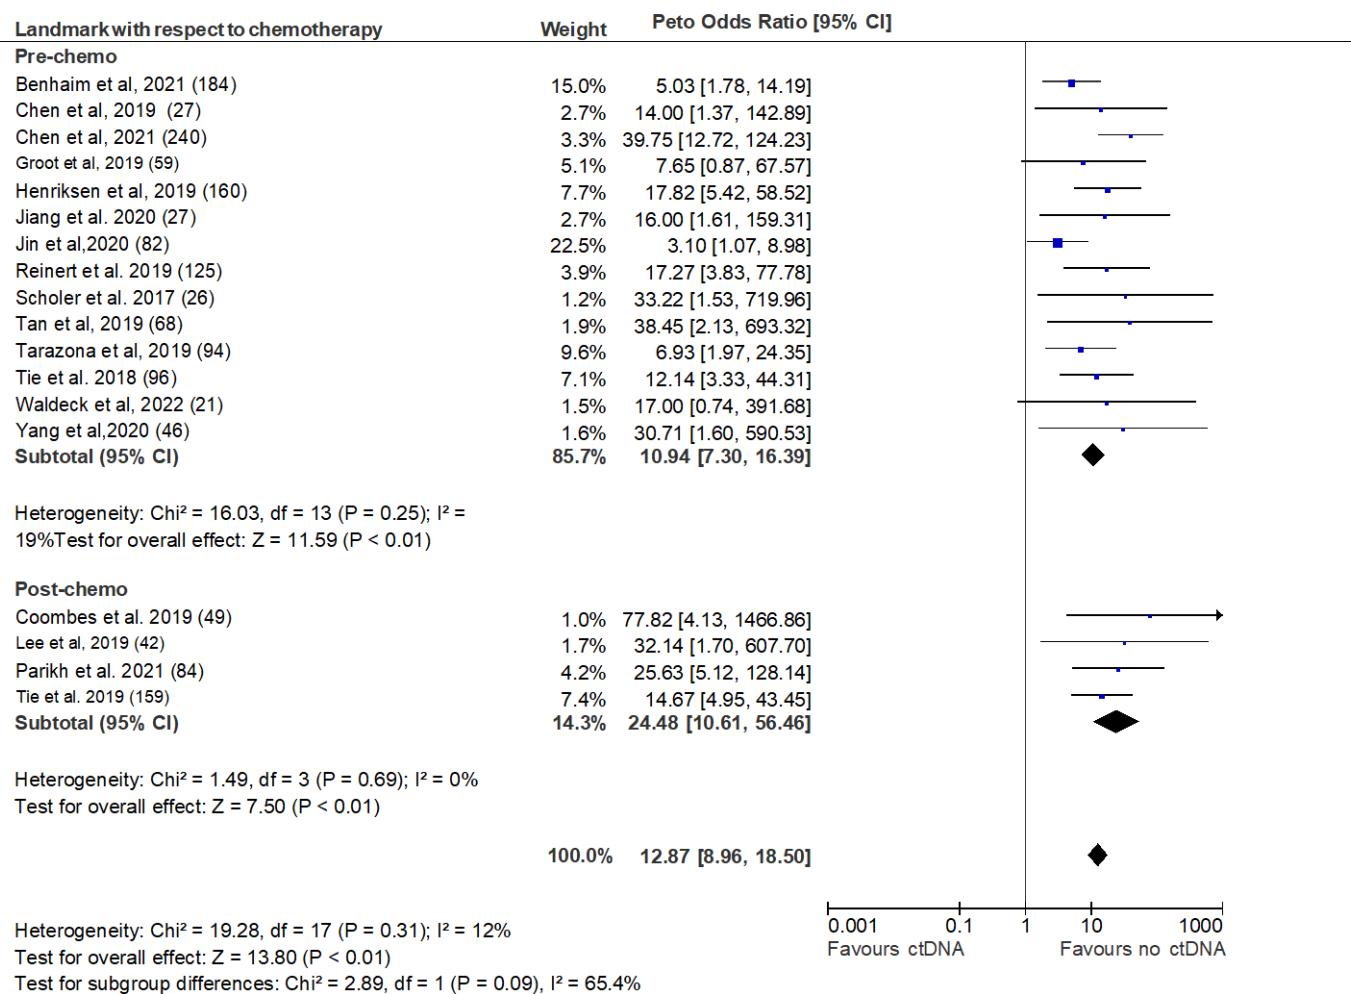

(N)= no of patients

Supplementary Figure 2: Funnel plot for landmark studies

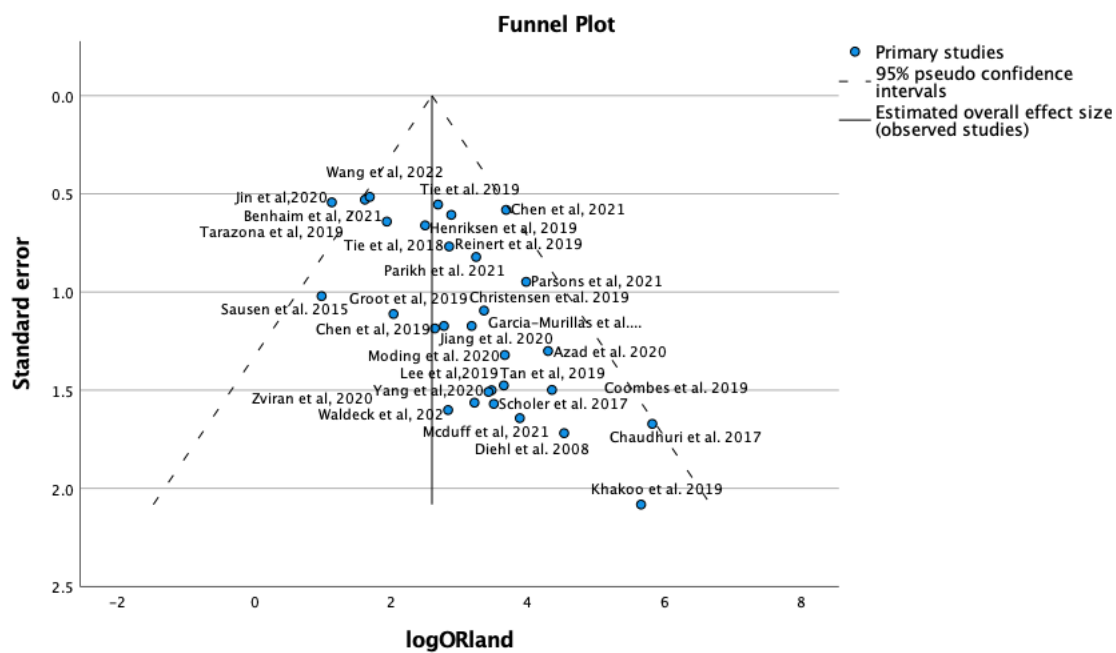

Supplementary Figure 3: Surveillance by disease site (sensitivity analysis)

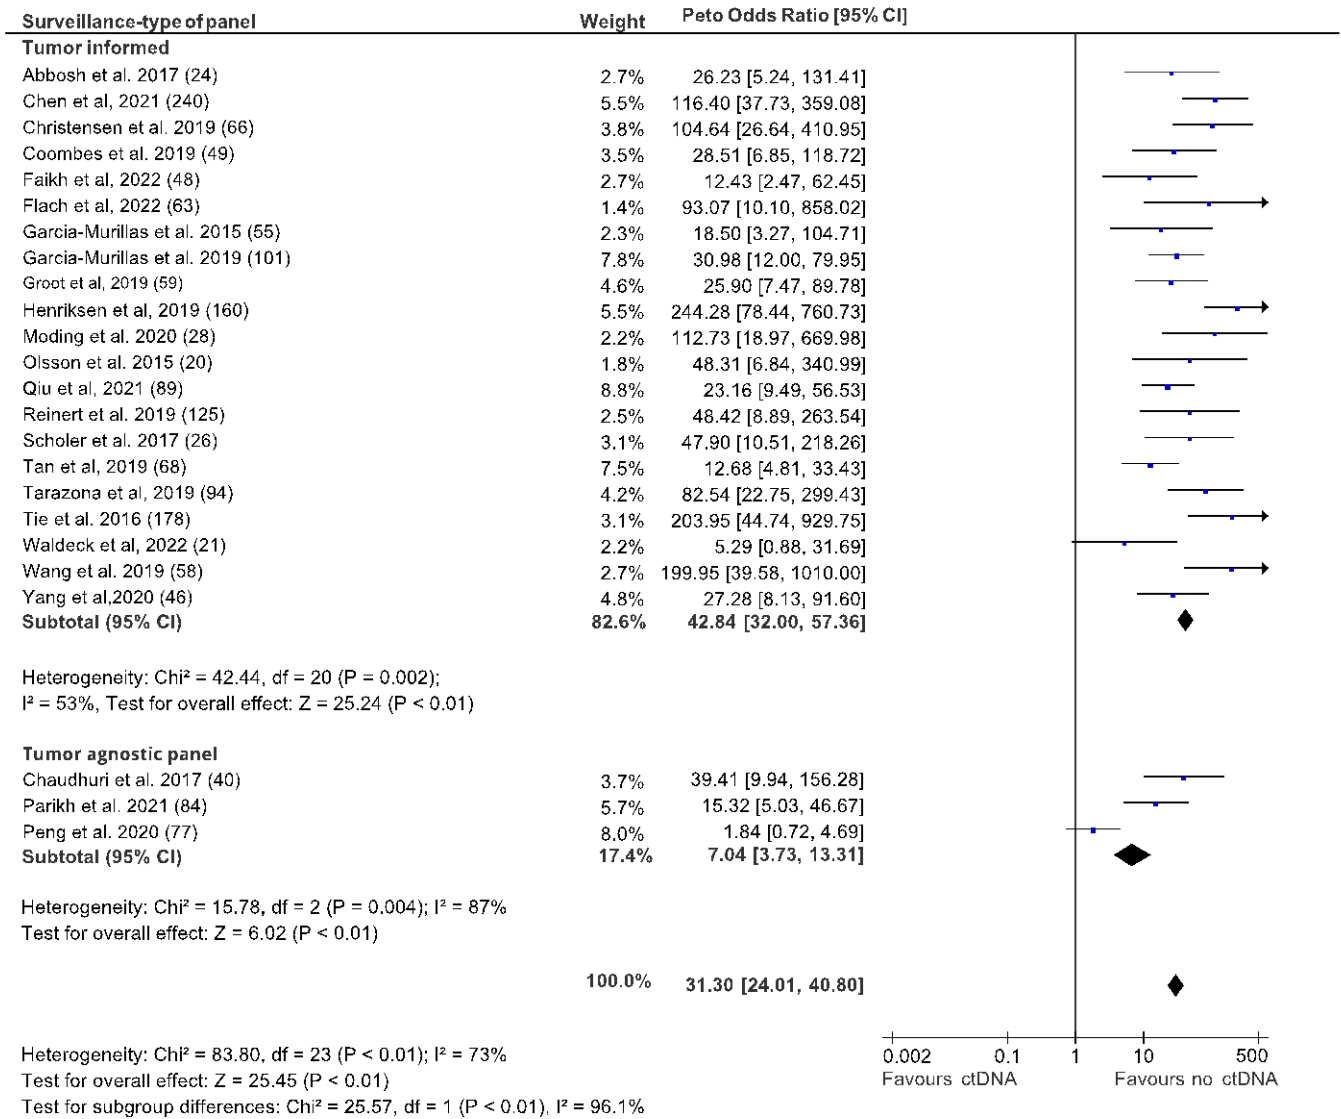

(N)= number of patients

Supplementary Figure 4: Funnel Plot for surveillance studies

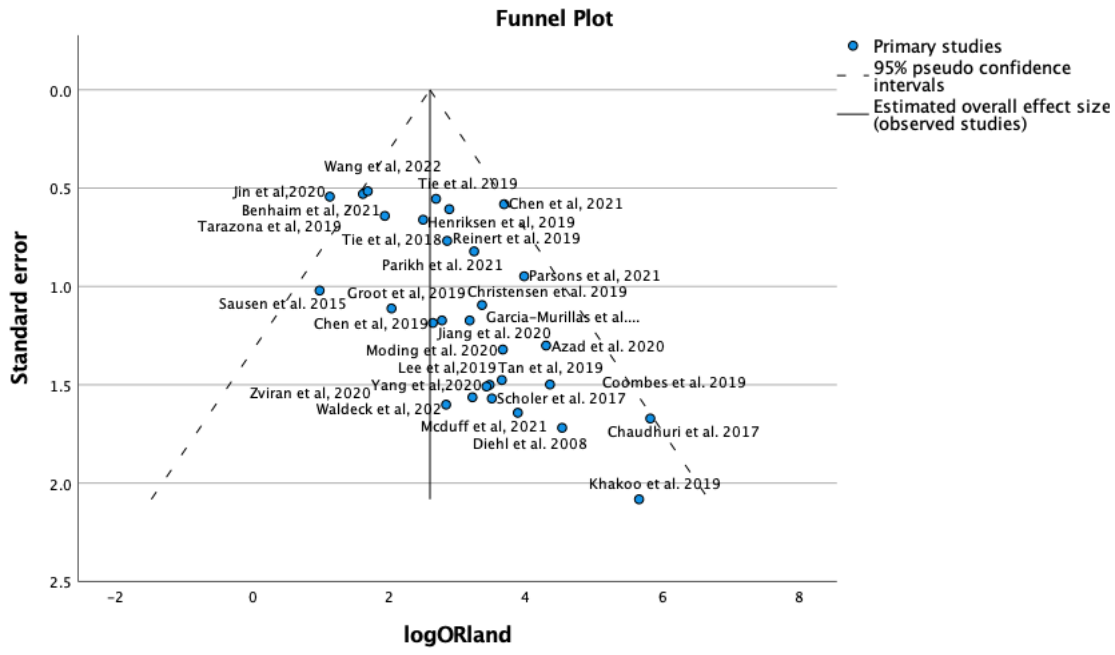

Supplement: pkad040_supplementary_data.pdf [file pkad040_supplementary_data.pdf]
